# Supplementary material for: Observation of others’ threat reactions recovers memories previously shaped by firsthand experiences
Source: PubMed Central journal article supplement — Proc Natl Acad Sci U S A. 2021 Jul 23;118(30):e2101290118. doi: 10.1073/pnas.2101290118 (PMC8325359; doi:10.1073/pnas.2101290118), 2021-07-23
Supplement: pnas.2101290118.sapp.pdf [file pnas.2101290118.sapp.pdf]

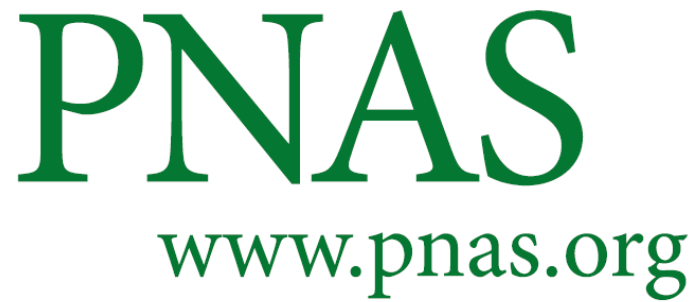

**Supplementary Information for  
Observation of others' threat reactions recovers memories previously  
shaped by first-hand experiences**

Jan Haaker, Lorenzo Diaz-Mataix, Gemma Guillazo-Blanch, Sara A. Stark, Lea Kern,  
Joseph E. LeDoux, Andreas Olsson

corresponding author  
Email: [j.haaker@uke.de](mailto:j.haaker@uke.de)

**This PDF file includes:**

Supplementary text  
Tables S1 to S25  
Figures S1 to S7  
SI References

**Table S1: ACQUISITION TRAINING Experiment 1 rmANOVA SCR**

SCR acquisition training, no differences between groups.

## Within Subjects Effects

| Cases                   | Sphericity Correction | Sum of Squares | df   | Mean Square | F     | p     | $\eta^2_p$ |
|-------------------------|-----------------------|----------------|------|-------------|-------|-------|------------|
| CS-type                 | None                  | 0.593          | 1,33 | 0.593       | 5.712 | 0.023 | 0.148      |
| CS-type * GROUP         | None                  | 0.004          | 1,33 | 0.004       | 0.037 | 0.848 | 0.001      |
| Block                   | None                  | 1.360          | 1,33 | 1.360       | 8.020 | 0.008 | 0.196      |
| Block * GROUP           | None                  | 0.168          | 1,33 | 0.168       | 0.990 | 0.327 | 0.029      |
| Block * CS-type         | None                  | 0.176          | 1,33 | 0.176       | 0.532 | 0.471 | 0.016      |
| Block * CS-type * GROUP | None                  | 0.069          | 1,33 | 0.069       | 0.209 | 0.650 | 0.006      |

*Note.* Sphericity corrections not available for factors with 2 levels.*Note.* Type II Sum of Squares

## Between Subjects Effects

| Cases | Sum of Squares | df   | Mean Square | F     | p     | $\eta^2_p$ |
|-------|----------------|------|-------------|-------|-------|------------|
| GROUP | 0.227          | 1,33 | 0.227       | 0.504 | 0.483 | 0.015      |

*Note.* Type II Sum of Squares**Simple Comparisons - CS-type**

|     |     | Mean Difference | SE    | t     | Cohen's d | $p_{\text{holm}}$ |
|-----|-----|-----------------|-------|-------|-----------|-------------------|
| CSP | CSM | 0.130           | 0.054 | 2.394 | 0.405     | 0.022             |

*Note.* Cohen's d does not correct for multiple comparisons.*Note.* Results are averaged over the levels of: GROUP, Block**Simple Comparisons - Block**

|    |    | Mean Difference | SE    | t     | Cohen's d | $p_{\text{holm}}$ |
|----|----|-----------------|-------|-------|-----------|-------------------|
| B1 | B2 | 0.199           | 0.070 | 2.859 | 0.483     | 0.007             |

*Note.* Cohen's d does not correct for multiple comparisons.*Note.* Results are averaged over the levels of: GROUP, CS-type**Descriptives**

| CS-type | Block | GROUP | Mean  | SD    | N  |
|---------|-------|-------|-------|-------|----|
| CSM     | 1     | 0     | 0.524 | 0.349 | 17 |
|         |       | 1     | 0.429 | 0.297 | 18 |
|         | 2     | 0     | 0.372 | 0.439 | 17 |
|         |       | 1     | 0.327 | 0.376 | 18 |
| CSP     | 1     | 0     | 0.782 | 0.703 | 17 |
|         |       | 1     | 0.577 | 0.967 | 18 |
|         | 2     | 0     | 0.397 | 0.272 | 17 |
|         |       | 1     | 0.419 | 0.220 | 18 |

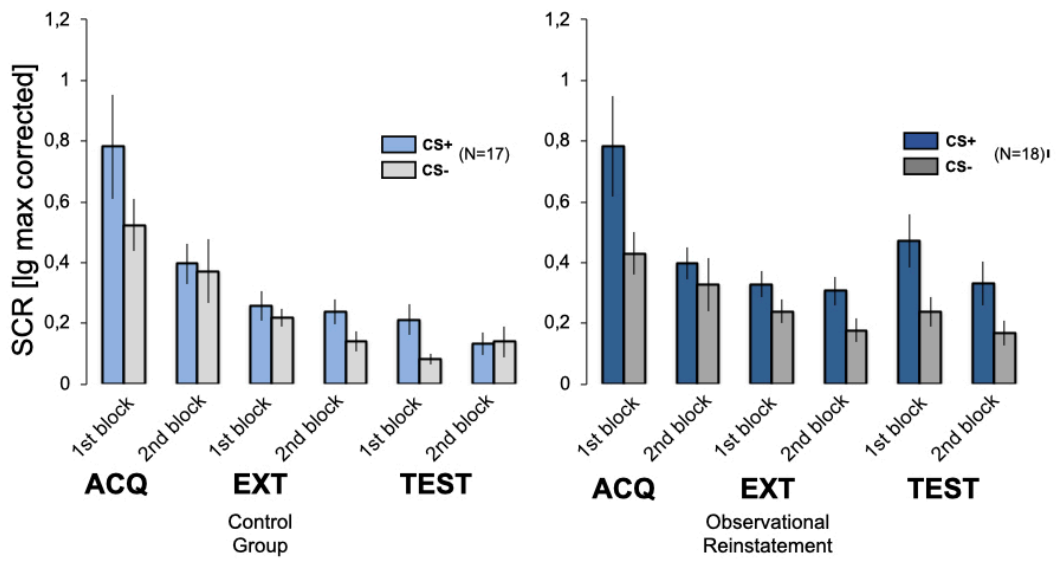

**Figure S1: SCRs Experiment 1 block-wise**

**Table S2: EXTINCTION TRAINING Experiment1 rmANOVA SCR**

SCR extinction, no differences between groups

## Within Subjects Effects

| Cases                   | Sphericity Correction | Sum of Squares | df   | Mean Square | F     | p     | $\eta^2_p$ |
|-------------------------|-----------------------|----------------|------|-------------|-------|-------|------------|
| CS-type                 | None                  | 0.282          | 1,33 | 0.282       | 9.482 | 0.004 | 0.223      |
| CS-type * GROUP         | None                  | 0.015          | 1,33 | 0.015       | 0.496 | 0.486 | 0.015      |
| Block                   | None                  | 0.072          | 1,33 | 0.072       | 2.889 | 0.099 | 0.080      |
| Block * GROUP           | None                  | 2.707e-4       | 1,33 | 2.707e-4    | 0.011 | 0.917 | 3.301e-4   |
| Block * CS-type         | None                  | 0.020          | 1,33 | 0.020       | 0.957 | 0.335 | 0.028      |
| Block * CS-type * GROUP | None                  | 8.786e-4       | 1,33 | 8.786e-4    | 0.042 | 0.839 | 0.001      |

*Note.* Sphericity corrections not available for factors with 2 levels.*Note.* Type II Sum of Squares

## Between Subjects Effects

| Cases | Sum of Squares | df   | Mean Square | F     | p     | $\eta^2_p$ |
|-------|----------------|------|-------------|-------|-------|------------|
| GROUP | 0.085          | 1,33 | 0.085       | 2.113 | 0.156 | 0.060      |

*Note.* Type II Sum of Squares

## Simple Comparisons - CS-type

|         | Mean Difference | SE    | t     | Cohen's d | p <sub>holm</sub> |
|---------|-----------------|-------|-------|-----------|-------------------|
| CSP CSM | 0.089           | 0.029 | 3.058 | 0.517     | 0.004             |

*Note.* Cohen's d does not correct for multiple comparisons.*Note.* Results are averaged over the levels of: GROUP, Block

## Late EXTINCTION (Block 2)

## Two-sided Independent Samples T-Test between groups

No difference between groups at the end of extinction

## Independent Samples T-Test

|                 | t      | df | p     | Mean Difference | SE Difference | Cohen's d |
|-----------------|--------|----|-------|-----------------|---------------|-----------|
| CSP EXT Block 2 | -1.071 | 33 | 0.292 | -0.068          | 0.063         | -0.362    |
| CSM EXT Block 2 | -0.718 | 33 | 0.478 | -0.037          | 0.051         | -0.243    |

## Descriptives

| CS-type | Block | GROUP | Mean  | SD    | N  |
|---------|-------|-------|-------|-------|----|
| CSM     | 1     | 0     | 0.218 | 0.127 | 17 |
|         |       | 1     | 0.239 | 0.168 | 18 |
|         | 2     | 0     | 0.140 | 0.139 | 17 |
|         |       | 1     | 0.177 | 0.161 | 18 |
| CSP     | 1     | 0     | 0.257 | 0.200 | 17 |
|         |       | 1     | 0.329 | 0.179 | 18 |
|         | 2     | 0     | 0.238 | 0.169 | 17 |
|         |       | 1     | 0.306 | 0.202 | 18 |

**Table S3: REINSTATEMENT analyses Experiment1 rm ANOVA SCR**

Reinstatement Analysis (second block extinction, first block reinstatement Test) reveals difference between groups.

Within Subjects Effects

| Cases                           | Sphericity Correction | Sum of Squares | df          | Mean Square  | F            | p            | $\eta^2_p$   |
|---------------------------------|-----------------------|----------------|-------------|--------------|--------------|--------------|--------------|
| CS-type                         | None                  | 0.771          | 1,33        | 0.771        | 21.050       | 6.176e-5     | 0.389        |
| CS-type * GROUP                 | None                  | 0.039          | 1,33        | 0.039        | 1.058        | 0.311        | 0.031        |
| Reinstatement                   | None                  | 0.049          | 1,33        | 0.049        | 1.131        | 0.295        | 0.033        |
| Reinstatement * GROUP           | None                  | <b>0.212</b>   | <b>1,33</b> | <b>0.212</b> | <b>4.891</b> | <b>0.034</b> | <b>0.129</b> |
| Reinstatement * CS-type         | None                  | 0.042          | 1,33        | 0.042        | 1.356        | 0.253        | 0.039        |
| Reinstatement * CS-type * GROUP | None                  | 0.011          | 1,33        | 0.011        | 0.354        | 0.556        | 0.011        |

Note. Sphericity corrections not available for factors with 2 levels.

Note. Type II Sum of Squares

Between Subjects Effects

| Cases | Sum of Squares | df   | Mean Square | F     | p     | $\eta^2_p$ |
|-------|----------------|------|-------------|-------|-------|------------|
| GROUP | 0.591          | 1,33 | 0.591       | 9.136 | 0.005 | 0.217      |

Note. Type II Sum of Squares

**Simple Comparisons - CS-type**

|         | Mean Difference | SE    | t     | Cohen's d | $p_{holm}$ |
|---------|-----------------|-------|-------|-----------|------------|
| CSP CSM | 0.147           | 0.032 | 4.557 | 0.770     | 6.766e-5   |

Note. Cohen's d does not correct for multiple comparisons.

Note. Results are averaged over the levels of: GROUP, Reinstatement

**Descriptives**

Descriptives

| CS-type | Reinstatement | GROUP | Mean  | SD    | N  |
|---------|---------------|-------|-------|-------|----|
| CSM     | Extinction    | 0     | 0.140 | 0.139 | 17 |
|         |               | 1     | 0.177 | 0.161 | 18 |
|         | Reinstatement | 0     | 0.081 | 0.072 | 17 |
|         |               | 1     | 0.238 | 0.211 | 18 |
| CSP     | Extinction    | 0     | 0.238 | 0.169 | 17 |
|         |               | 1     | 0.306 | 0.202 | 18 |
|         | Reinstatement | 0     | 0.212 | 0.209 | 17 |
|         |               | 1     | 0.471 | 0.373 | 18 |

**Table S4: REINSTATEMENT Experiment 1****One-sided independent samples t-Test SCR between groups**

The increase in SCRs from extinction (last block) to reinstatement test (first block) is larger after observational reinstatement, when compared to the increase in the control group. Furthermore, responses are larger to the CSP and the CSM during reinstatement test after observational reinstatement, when compared to the control group

|                                                                                      | t      | df | p <sub>uncorr</sub> | p <sub>Holm</sub> | Mean Difference | SE Difference | Cohen's d |
|--------------------------------------------------------------------------------------|--------|----|---------------------|-------------------|-----------------|---------------|-----------|
| Mean increase (CSP and CSM) from EXTINCTION (Block2) to REINSTATEMENT-Test (Block 1) | -2.213 | 33 | 0.017               | <b>0.017</b>      | -0.156          | 0.070         | -0.748    |
| CSP REINSTATEMENT-Test (Block 1)                                                     | -2.513 | 33 | 0.009               | <b>0.018</b>      | -0.259          | 0.103         | -0.850    |
| CSM REINSTATEMENT-Test (Block 1)                                                     | -2.903 | 33 | 0.003               | <b>0.009</b>      | -0.157          | 0.054         | -0.982    |

Note. For all tests, the alternative hypothesis specifies that group 0 is less than group 1

Note. Corrected p-values (p<sub>Holm</sub>) correct for 3 comparisons.

Additionally, we explored the CS-specific increase in SCRs. These post-hoc tests were not indicated by the ANOVA and results are displayed for additional information.

|                                                                            | t      | df              | p <sub>uncorr</sub> | p <sub>Holm</sub> | Mean Difference | SE Difference | Cohen's d |
|----------------------------------------------------------------------------|--------|-----------------|---------------------|-------------------|-----------------|---------------|-----------|
| Mean increase CSP from EXTINCTION (Block2) to REINSTATEMENT-Test (Block 1) | -1.728 | 24 <sup>a</sup> | 0.048               | <b>0.048</b>      | -0.191          | 0.101         | -0.857    |
| Mean increase CSM from EXTINCTION (Block2) to REINSTATEMENT-Test (Block 1) | -2.903 | 33              | 0.038               | <b>0.076</b>      | -0.120          | 0.066         | -0.620    |

Note. For all tests, the alternative hypothesis specifies that group 0 is less than group 1

Note. Corrected p-values (p<sub>Holm</sub>) correct for 2 comparisons.

Note. <sup>a</sup> A welch test was performed in order to account for violations of sphericity (deviation from equality of variances)

## Descriptives

Group Descriptives (Group 0 = Control; Group 1= Experimental-Group)

|                                                                  | Group | N  | Mean   | SD    | SE    |
|------------------------------------------------------------------|-------|----|--------|-------|-------|
| Increase Mean EXTINCTION(Block2) to REINSTATEMENT Test (Block 1) | 0     | 17 | -0.043 | 0.150 | 0.036 |
|                                                                  | 1     | 18 | 0.113  | 0.251 | 0.059 |
| CSP REINSTATEMENT (Block 1)                                      | 0     | 17 | 0.212  | 0.209 | 0.051 |
|                                                                  | 1     | 18 | 0.471  | 0.373 | 0.088 |
| CSM REINSTATEMENT (Block 1)                                      | 0     | 17 | 0.081  | 0.072 | 0.017 |
|                                                                  | 1     | 18 | 0.238  | 0.211 | 0.050 |

## Table S5 Control analyses: REINSTATEMENT-Test Block 1&2 One-sided independent Samples T-Test

Larger responses to the CSP and CSM in the Reinstatement-Test reinstatement when comparing the whole reinstatement test phase (Block 1 and 2) between groups.

|                                      | t     | df | p <sub>uncorr</sub> | p <sub>Holm</sub> | Mean Difference | SE Difference | Cohen's d |
|--------------------------------------|-------|----|---------------------|-------------------|-----------------|---------------|-----------|
| CSP REINSTATEMENT-Test (Block 1 & 2) | 2.905 | 33 | 0.003               | --                | -0.229          | 0.079         | -0.983    |
| CSM REINSTATEMENT-Test (Block 1 & 2) | 1.883 | 33 | 0.034               | --                | -0.093          | 0.050         | -0.637    |

*Note.* For all tests, the alternative hypothesis specifies that group 0 is less than group 1.

## Descriptives

### Group Descriptives

|                                    | Group | N  | Mean  | SD    | SE    |
|------------------------------------|-------|----|-------|-------|-------|
| CSP Reinstatement-Test (Block 1&2) | 0     | 17 | 0.172 | 0.174 | 0.042 |
|                                    | 1     | 18 | 0.401 | 0.277 | 0.065 |
| CSM Reinstatement-Test (Block 1&2) | 0     | 17 | 0.110 | 0.113 | 0.027 |
|                                    | 1     | 18 | 0.203 | 0.172 | 0.041 |

**Table S6 REINST rm ANOVA Experiment 1 SCR, including all participants**

Inclusion of the excluded participants in Experiment 1 still revealed a significant increase of SCRs from late extinction to the first block of the Reinstatement-Test after the observational reinstatement procedure in the experimental, but not in the control group [group by phase interaction:  $F(1,37) = 4.14, p = 0.049; \eta^2 = 0.129; \eta^2 = .098$ ].

**Within Subjects Effects**

| Cases                           | Sphericity Correction | Sum of Squares | df           | Mean Square  | F            | p             | $\eta^2_p$   |
|---------------------------------|-----------------------|----------------|--------------|--------------|--------------|---------------|--------------|
| CS-type                         | None                  | 0.680          | 1.000        | 0.680        | 18.245       | $1.302e^{-4}$ | 0.330        |
| CS-type * GROUP                 | None                  | 0.022          | 1.000        | 0.022        | 0.587        | 0.449         | 0.016        |
| Residuals                       | None                  | 1.379          | 37.000       | 0.037        |              |               |              |
| Reinstatement                   | None                  | 0.042          | 1.000        | 0.042        | 1.001        | 0.324         | 0.026        |
| <b>Reinstatement * GROUP</b>    | <b>None</b>           | <b>0.176</b>   | <b>1.000</b> | <b>0.176</b> | <b>4.144</b> | <b>0.049</b>  | <b>0.101</b> |
| Residuals                       | None                  | 1.569          | 37.000       | 0.042        |              |               |              |
| Reinstatement * CS-type         | None                  | 0.028          | 1.000        | 0.028        | 0.972        | 0.331         | 0.026        |
| Reinstatement * CS-type * GROUP | None                  | 0.005          | 1.000        | 0.005        | 0.181        | 0.673         | 0.005        |
| Residuals                       | None                  | 1.569          | 37.000       | 0.042        |              |               |              |

Note. Sphericity corrections not available for factors with 2 levels.

Note. Type II Sum of Squares

**Between Subjects Effects**

| Cases     | Sum of Squares | df | Mean Square | F     | p     | $\eta^2_p$ |
|-----------|----------------|----|-------------|-------|-------|------------|
| GROUP     | 0.587          | 1  | 0.587       | 9.264 | 0.004 | 0.200      |
| Residuals | 2.345          | 37 | 0.063       |       |       |            |

Note. Type II Sum of Squares

**Descriptives**

**Descriptives**

| CS-type | Reinstatement | GROUP | Mean  | SD    | N  |
|---------|---------------|-------|-------|-------|----|
| CSM     | Extinction    | 0     | 0.135 | 0.137 | 18 |
|         |               | 1     | 0.179 | 0.159 | 21 |
|         | Reinstatement | 0     | 0.081 | 0.070 | 18 |
|         |               | 1     | 0.236 | 0.196 | 21 |
| CSP     | Extinction    | 0     | 0.227 | 0.170 | 18 |
|         |               | 1     | 0.295 | 0.196 | 21 |
|         | Reinstatement | 0     | 0.202 | 0.207 | 18 |
|         |               | 1     | 0.428 | 0.367 | 21 |



## Exclusion of outliers (median $\pm 3\sigma$ ) in observational reinstatement Experiment 1 SCR

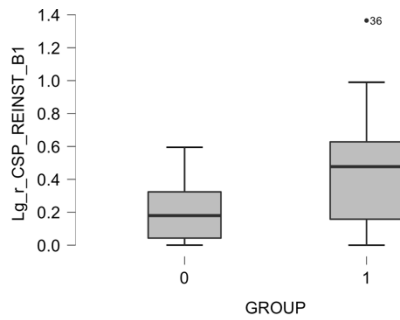

Figure S2: Boxplot labeling outlier participants during CS+ in the reinstatement-test in the control group (=0) and the experimental group (=1)

In order to test if responses within the reinstatement-test were driven by outliers, we excluded outliers, defined as mean responses in the first block during the reinstatement-test that were above or below median  $\pm 3\sigma$ , respectively (N=1 from the experimental group, see figure S2). The results resembled the findings reported within the whole sample (see table S7).

**Table S7: REINSTATEMENT Experiment 1 excluding outliers**  
**One-sided independent samples t-Test SCR between groups**

|                                                                                      | t      | df | p <sub>uncorr</sub> | Mean Difference | SE Difference | Cohen's d |
|--------------------------------------------------------------------------------------|--------|----|---------------------|-----------------|---------------|-----------|
| Mean increase (CSP and CSM) from EXTINCTION (Block2) to REINSTATEMENT-Test (Block 1) | -1.931 | 32 | 0.031               | -0.126          | 0.065         | -0.662    |
| CSP REINSTATEMENT-Test (Block 1)                                                     | -2.286 | 32 | 0.014               | -0.206          | 0.090         | -0.784    |
| CSM REINSTATEMENT-Test (Block 1)                                                     | -2.976 | 32 | 0.003               | -0.164          | 0.055         | -1.021    |

Note. For all tests, the alternative hypothesis specifies that group 0 (=control group) is less than group 1 (experimental group).

## Alternative range correction of SCRs to the maximum during acquisition

In order to test if observational reinstatement effects in Experiment 1 were contingent on the range-correction of SCRs, we included an additional analysis of range-corrected SCRs to the maximum during acquisition (see table S8 and figure S3).

**Table S8: REINSTATEMENT Experiment 1 SCRs Range correction to the maximum during acquisition.**  
**One-sided independent samples t-Test SCR between groups**

|                                                                                      | t     | df | $p_{uncorr}$ | $p_{Holm}$ | Mean Difference | SE Difference | Cohen's d |
|--------------------------------------------------------------------------------------|-------|----|--------------|------------|-----------------|---------------|-----------|
| <b>Range correction to the max of the acquisition</b>                                |       |    |              |            |                 |               |           |
| Mean increase (CSP and CSM) from EXTINCTION (Block2) to REINSTATEMENT-Test (Block 1) | 1.966 | 33 | 0.029        | 0.029      | 0.048           | 0.024         | 0.665     |
| CSP REINSTATEMENT-Test (Block 1)                                                     | 2.563 | 33 | 0.008        | 0.016      | 0.074           | 0.029         | 0.867     |
| CSM REINSTATEMENT-Test (Block 1)                                                     | 2.749 | 33 | 0.005        | 0.015      | 0.052           | 0.019         | 0.930     |

Note. For all tests, the alternative hypothesis specifies that group 0 is less than group 1  
 Note. Corrected  $p$ -values ( $p_{Holm}$ ) correct for 3 comparisons.

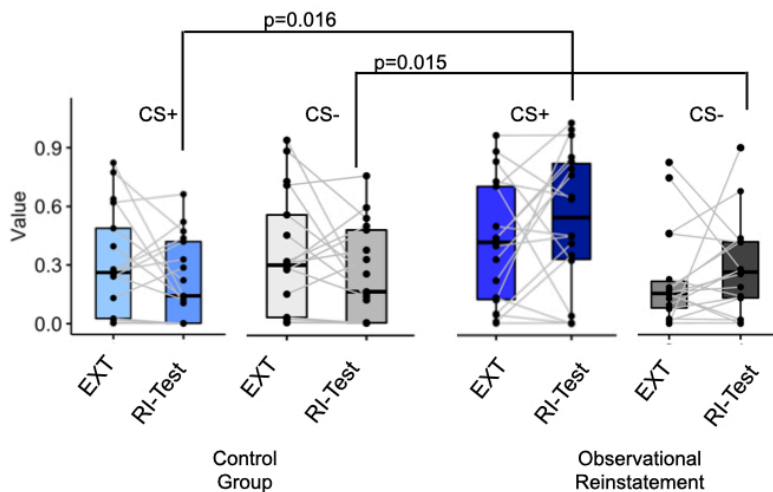

Figure S3: Boxplots of individual SCRs during late extinction (2nd block) reinstatement-test (1st block) for each the CS+ in the control group (left four bars) and observational reinstatement group (right four bars). P-values indicate post-hoc t-test (one-sided in panel c, corrected for multiple comparisons using Bonferroni-Holm).

## Table S 9 ACQUISITION TRAINING Experiment 2 rm ANOVA SCR

Successful acquisition of CS-US associations, indicated by higher SCRs towards the CS+ as compared to the CS-.

### Within Subjects Effects

| Cases           | Sphericity Correction | Sum of Squares     | df                 | Mean Square        | F                  | p                                 | $\eta^2_p$ |
|-----------------|-----------------------|--------------------|--------------------|--------------------|--------------------|-----------------------------------|------------|
| CS-type         | None                  | 1.526              | 1,20               | 1.526              | 7.987              | 0.010                             | 0.285      |
| Block           | None                  | 6.141 <sup>a</sup> | 3,60 <sup>a</sup>  | 2.047 <sup>a</sup> | 7.349 <sup>a</sup> | 2.830e <sup>-a</sup> <sub>4</sub> | 0.269      |
|                 | Greenhouse-Geisser    | 6.141              | 1.697, 33.937      | 3.619              | 7.349              | 0.003                             | 0.269      |
| CS-type * Block | None                  | 0.326 <sup>a</sup> | 3, 60 <sup>a</sup> | 0.109 <sup>a</sup> | 0.918 <sup>a</sup> | 0.438 <sup>a</sup>                | 0.044      |
|                 | Greenhouse-Geisser    | 0.326              | 1.944, 38.879      | 0.168              | 0.918              | 0.405                             | 0.044      |

Note. Sphericity corrections not available for factors with 2 levels.

Note. Type II Sum of Squares

<sup>a</sup> Mauchly's test of sphericity indicates that the assumption of sphericity is violated ( $p < .05$ ).

### Between Subjects Effects

| Cases     | Sum of Squares | df | Mean Square | F | p |
|-----------|----------------|----|-------------|---|---|
| Residuals | 16.926         | 20 | 0.846       |   |   |

Note. Type II Sum of Squares

### Simple Comparisons – CS-type

|         | Mean Difference | SE    | t     | Cohen's d | $p_{holm}$ |
|---------|-----------------|-------|-------|-----------|------------|
| CSP CSM | 0.191           | 0.067 | 2.826 | 0.617     | 0.010      |

Note. Cohen's d does not correct for multiple comparisons.

Note. Results are averaged over the levels of: Block

## Descriptives

### Descriptives

| Stimulus | Block | Mean  | SD    | N  |
|----------|-------|-------|-------|----|
| CSM      | 1     | 0.648 | 0.620 | 21 |
|          | 2     | 0.435 | 0.409 | 21 |
|          | 3     | 0.264 | 0.198 | 21 |
|          | 4     | 0.222 | 0.157 | 21 |
| CSP      | 1     | 0.954 | 0.979 | 21 |
|          | 2     | 0.532 | 0.551 | 21 |
|          | 3     | 0.378 | 0.220 | 21 |
|          | 4     | 0.469 | 0.550 | 21 |

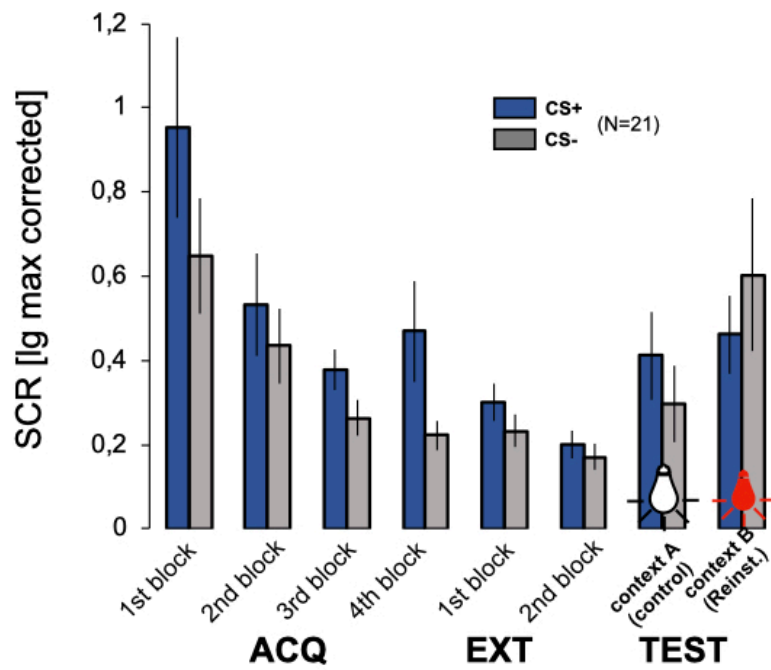

**Figure S4: SCRs Experiment 2, block-wise**

## Table S 10 EXTINCTION TRAINING Experiment 2 rm ANOVA SCR

Decreasing SCRs across extinction, no CS-type effect. 6 trials= 2 Blocks (a 3 trials)

### Within Subjects Effects

| Cases              | Sphericity Correction | Sum of Squares | df   | Mean Square | F     | p     | $\eta^2_p$ |
|--------------------|-----------------------|----------------|------|-------------|-------|-------|------------|
| CS-type            | None                  | 0.047          | 1,20 | 0.047       | 1.831 | 0.191 | 0.084      |
| Block              | None                  | 0.138          | 1,20 | 0.138       | 5.315 | 0.032 | 0.210      |
| CS-type *<br>Block | None                  | 0.008          | 1,20 | 0.008       | 0.418 | 0.525 | 0.020      |

*Note.* Sphericity corrections not available for factors with 2 levels.

*Note.* Type II Sum of Squares

### Between Subjects Effects

| Cases     | Sum of Squares | df | Mean Square | F | p |
|-----------|----------------|----|-------------|---|---|
| Residuals | 0.886          | 20 | 0.044       |   |   |

*Note.* Type II Sum of Squares

### Simple comparisons - Stimulus

|         | Mean Difference | SE    | t     | Cohen's d | $p_{holm}$ |
|---------|-----------------|-------|-------|-----------|------------|
| CSP CSM | 0.047           | 0.035 | 1.353 | 0.295     | 0.191      |

*Note.* Cohen's d does not correct for multiple comparisons.

*Note.* Results are averaged over the levels of: Block

### Simple comparisons - Block

|       | Mean Difference | SE    | t     | Cohen's d | $p_{holm}$ |
|-------|-----------------|-------|-------|-----------|------------|
| X1 X2 | 0.081           | 0.035 | 2.305 | 0.503     | 0.032      |

*Note.* Cohen's d does not correct for multiple comparisons.

*Note.* Results are averaged over the levels of: Stimulus

## Descriptives

### Descriptives

| Stimulus | Block | Mean  | SD    | N  |
|----------|-------|-------|-------|----|
| CSM      | 1     | 0.233 | 0.171 | 21 |
|          | 2     | 0.171 | 0.138 | 21 |
| CSP      | 1     | 0.300 | 0.209 | 21 |
|          | 2     | 0.199 | 0.149 | 21 |

## Table S11 REINSTATEMENT Experiment 2 rm ANOVA SCR

Increase of SCRs from 2nd half of extinction (block2) to Reinstatement Context (Red), but not the Control context.

The factor context includes three levels: late extinction, Context A and Context B

### Within Subjects Effects

| Cases              | Sphericity Correction     | Sum of Squares     | df                   | Mean Square        | F                  | p                  | $\eta^2_p$   |
|--------------------|---------------------------|--------------------|----------------------|--------------------|--------------------|--------------------|--------------|
| Stimulus           | None                      | 0.004              | 1,20                 | 0.004              | 0.052              | 0.822              | 0.003        |
| <b>Context</b>     | None                      | 2.292 <sup>a</sup> | 2,40 <sup>a</sup>    | 1.146 <sup>a</sup> | 5.554 <sup>a</sup> | 0.007 <sup>a</sup> | 0.217        |
|                    | <b>Greenhouse-Geisser</b> | <b>2.292</b>       | <b>1.433, 28.659</b> | <b>1.600</b>       | <b>5.554</b>       | <b>0.016</b>       | <b>0.217</b> |
| Stimulus * Context | None                      | 0.382 <sup>a</sup> | 2.000 <sup>a</sup>   | 0.191 <sup>a</sup> | 2.953 <sup>a</sup> | 0.064 <sup>a</sup> | 0.129        |
|                    | Greenhouse-Geisser        | 0.382              | 1.453                | 0.263              | 2.953              | 0.082              | 0.129        |
| Residuals          | None                      | 2.587              | 40.000               | 0.065              |                    |                    |              |
|                    | Greenhouse-Geisser        | 2.587              | 29.057               | 0.089              |                    |                    |              |

Note. Sphericity corrections not available for factors with 2 levels.

Note. Type II Sum of Squares

<sup>a</sup> Mauchly's test of sphericity indicates that the assumption of sphericity is violated ( $p < .05$ ).

### Between Subjects Effects

| Cases     | Sum of Squares | df | Mean Square | F | p |
|-----------|----------------|----|-------------|---|---|
| Residuals | 13.949         | 20 | 0.697       |   |   |

Note. Type II Sum of Squares

### Simple comparisons Context (one-sided t-test)

|                          |                      | Mean Difference | SE           | t             | Cohen's d     | $p_{holm}$   |
|--------------------------|----------------------|-----------------|--------------|---------------|---------------|--------------|
| Extinction               | RI-Test (control)    | -0.152          | 0.089        | -1.702        | -0.371        | 0.052        |
| <b>Extinction</b>        | <b>RI-Test (red)</b> | <b>-0.330</b>   | <b>0.126</b> | <b>-2.621</b> | <b>-0.572</b> | <b>0.025</b> |
| <b>RI-Test (control)</b> | <b>RI-Test (red)</b> | <b>-0.178</b>   | <b>0.075</b> | <b>-2.371</b> | <b>-0.517</b> | <b>0.028</b> |

Note. P-value adjusted for comparing a family of 3

Note. Results are averaged over the levels of: CS-type

Note. For all tests, the alternative hypothesis specifies that Measure 1 is less than Measure 2.

**Table S 12: One-sample paired Samples T-Test comparing CS by context**

|                                                                                       | t             | df | p <sub>uncorr</sub> | p <sub>Holm</sub> | Mean Difference | SE Difference | Cohen's d     |
|---------------------------------------------------------------------------------------|---------------|----|---------------------|-------------------|-----------------|---------------|---------------|
| CSP late extinction(block2)<br>vs.<br>CSP reinstatement-test context A (control)      | -1.602        |    | 0.062               | 0.124             | -0.178          | 0.111         | -0.350        |
| <b>CSP late extinction(block2)<br/>vs.<br/>CSP reinstatement-test context B (red)</b> | <b>-2.398</b> |    | <b>0.013</b>        | <b>0.039</b>      | <b>-0.228</b>   | <b>0.095</b>  | <b>-0.523</b> |
| CSM late extinction(block2)<br>vs.<br>CSM reinstatement-test context A (control)      | -1.525        |    | 0.071               | 0.071             | -0.126          | 0.083         | -0.333        |
| <b>CSM late extinction(block2)<br/>vs.<br/>CSM reinstatement-test context B (red)</b> | <b>-2.570</b> |    | <b>0.009</b>        | <b>0.036</b>      | <b>-0.432</b>   | <b>0.168</b>  | <b>-0.561</b> |

Note. For all tests, the alternative hypothesis specifies that Measure 1 is less than Measure 2.

**Table S 13 REINSTATEMENT EXP2 rm ANOVA order control**

Order of RI-testing (Context B/Red first or CContext A/Control first) had no effect on Reinstatement-Context effect

| Cases                     | Sphericity Correction | Sum of Squares | df            | Mean Square | F     | p            | $\eta^2_p$ |
|---------------------------|-----------------------|----------------|---------------|-------------|-------|--------------|------------|
| CS-type                   | None                  | 0.004          | 1,19          | 0.004       | 0.057 | 0.815        | 0.003      |
| CS-type * order           | None                  | 0.194          | 1,19          | 0.194       | 2.628 | 0.121        | 0.122      |
| Context                   | None                  | 2.292          | 2,38          | 1.146       | 5.291 | 0.009        | 0.218      |
|                           | Greenhouse-Geisser    | 2.292          | 1.427, 27.115 | 1.606       | 5.291 | <b>0.019</b> | 0.218      |
| Context * order           | None                  | 0.024          | 2,38          | 0.012       | 0.055 | 0.947        | 0.003      |
|                           | Greenhouse-Geisser    | 0.024          | 1.427, 27.115 | 0.017       | 0.055 | 0.894        | 0.003      |
| CS-type * Context         | None                  | 0.382          | 2,38          | 0.191       | 2.977 | 0.063        | 0.135      |
|                           | Greenhouse-Geisser    | 0.382          | 1.478         | 0.258       | 2.977 | 0.081        | 0.135      |
| CS-type * Context * order | None                  | 0.150          | 2,38          | 0.075       | 1.167 | 0.322        | 0.058      |
|                           | Greenhouse-Geisser    | 0.150          | 1.478         | 0.101       | 1.167 | 0.312        | 0.058      |

*Note.* Sphericity corrections not available for factors with 2 levels.

*Note.* Type II Sum of Squares

#### Between Subjects Effects

| Cases | Sum of Squares | df   | Mean Square | F     | p     |
|-------|----------------|------|-------------|-------|-------|
| order | 0.104          | 1,19 | 0.104       | 0.143 | 0.709 |

*Note.* Type II Sum of Squares



**Table S14 REINSTATEMENT Experiment rm ANOVA STAI Trait**

STAI trait had no effect on Reinstatement-Context effect

| Cases                          | Sphericity Correction | Sum of Squares | df            | Mean Square | F     | p            | $\eta^2_p$ |
|--------------------------------|-----------------------|----------------|---------------|-------------|-------|--------------|------------|
| CS-type                        | None                  | 0.004          | 1,19          | 0.004       | 0.053 | 0.820        | 0.003      |
| CS-type * STAI Trait           | None                  | 0.112          | 1,19          | 0.112       | 1.431 | 0.246        | 0.070      |
| Context                        | None                  | 2.292          | 2,38          | 1.146       | 5.294 | 0.009        | 0.218      |
|                                | Greenhouse-Geisser    | 2.292          | 1.435, 27.257 | 1.598       | 5.294 | <b>0.019</b> | 0.218      |
| Context * STAI Trait           | None                  | 0.028          | 2,38          | 0.014       | 0.064 | 0.938        | 0.003      |
|                                | Greenhouse-Geisser    | 0.028          | 1.435, 27.257 | 0.019       | 0.064 | 0.883        | 0.003      |
| CS-type * Context              | None                  | 0.382          | 2,38          | 0.191       | 2.895 | 0.068        | 0.132      |
|                                | Greenhouse-Geisser    | 0.382          | 1.399, 26.575 | 0.273       | 2.895 | 0.089        | 0.132      |
| CS-type * Context * STAI Trait | None                  | 0.080          | 2,38          | 0.040       | 0.607 | 0.550        | 0.031      |
|                                | Greenhouse-Geisser    | 0.080          | 1.399, 26.575 | 0.057       | 0.607 | 0.496        | 0.031      |

**Table S15 REINSTATEMENT Experiment 2 rm ANOVA STAI State**

STAI state had no effect on Reinstatement-Context effect

| Cases                          | Sphericity Correction | Sum of Squares | df            | Mean Square | F      | p            | $\eta^2_p$ |
|--------------------------------|-----------------------|----------------|---------------|-------------|--------|--------------|------------|
| CS-type                        | None                  | 0.004          | 1,19          | 0.004       | 0.050  | 0.826        | 0.003      |
| CS-type * STAI State           | None                  | 7.76e-6        | 1,19          | 7.7e-6      | 9.2e-5 | 0.992        | 4.2e-6     |
| Context                        | None                  | 2.292          | 2,38          | 1.146       | 5.303  | 0.009        | 0.218      |
|                                | Greenhouse-Geisser    | 2.292          | 1.427, 27.120 | 1.606       | 5.303  | <b>0.019</b> | 0.218      |
| Context * STAI State           | None                  | 0.041          | 2,38          | 0.021       | 0.095  | 0.910        | 0.005      |
|                                | Greenhouse-Geisser    | 0.041          | 1.427, 27.120 | 0.029       | 0.095  | 0.845        | 0.005      |
| CS-type * Context              | None                  | 0.382          | 2,38          | 0.191       | 2.994  | 0.062        | 0.136      |
|                                | Greenhouse-Geisser    | 0.382          | 1.449, 27.537 | 0.264       | 2.994  | 0.081        | 0.136      |
| CS-type * Context * STAI State | None                  | 0.163          | 2,38          | 0.082       | 1.279  | 0.290        | 0.063      |
|                                | Greenhouse-Geisser    | 0.163          | 1.449, 27.537 | 0.113       | 1.279  | 0.284        | 0.063      |

**Table S16 EXT to RI-Test Repeated Measures ANOVA Experiment 2, inclusion of all participants**

Inclusion of all participants in Experiment 2 did not conceptually change the results, as analyses of this sample revealed a significant main effect of context ( $F(2,44) = 5.220$ ,  $p = .019$ ,  $\eta^2 = .129$ ).

**Within Subjects Effects**

| Cases             | Sphericity Correction | Sum of Squares     | df                 | Mean Square        | F                  | p                  | $\eta^2_p$ |
|-------------------|-----------------------|--------------------|--------------------|--------------------|--------------------|--------------------|------------|
| CS-type           | None                  | 0.002              | 1.000              | 0.002              | 0.024              | 0.878              | 0.001      |
| Residuals         | None                  | 1.606              | 22.000             | 0.073              |                    |                    |            |
| Context           | None                  | 2.026 <sup>a</sup> | 2.000 <sup>a</sup> | 1.013 <sup>a</sup> | 5.220 <sup>a</sup> | 0.009 <sup>a</sup> | 0.192      |
|                   | Greenhouse-Geisser    | 2.026              | 1.418              | 1.429              | 5.220              | <b>0.019</b>       | 0.192      |
| Residuals         | None                  | 8.539              | 44.000             | 0.194              |                    |                    |            |
|                   | Greenhouse-Geisser    | 8.539              | 31.191             | 0.274              |                    |                    |            |
| Context * CS-type | None                  | 0.339 <sup>a</sup> | 2.000 <sup>a</sup> | 0.169 <sup>a</sup> | 2.815 <sup>a</sup> | 0.071 <sup>a</sup> | 0.113      |
|                   | Greenhouse-Geisser    | 0.339              | 1.462              | 0.232              | 2.815              | 0.089              | 0.113      |
| Residuals         | None                  | 8.539              | 44.000             | 0.194              |                    |                    |            |
|                   | Greenhouse-Geisser    | 8.539              | 31.191             | 0.274              |                    |                    |            |

Note. Sphericity corrections not available for factors with 2 levels.

Note. Type II Sum of Squares

<sup>a</sup> Mauchly's test of sphericity indicates that the assumption of sphericity is violated ( $p < .05$ ).

**Between Subjects Effects**

| Cases     | Sum of Squares | df | Mean Square | F | p |
|-----------|----------------|----|-------------|---|---|
| Residuals | 15.248         | 22 | 0.693       |   |   |

Note. Type II Sum of Squares

**Simple comparisons Context (one-sided t-test)**

|                          |                      | Mean Difference | SE           | t             | Cohen's d     | $p_{\text{holm}}$ |
|--------------------------|----------------------|-----------------|--------------|---------------|---------------|-------------------|
| Extinction               | RI-Test (control)    | -0.134          | 0.083        | -1.623        | -0.338        | 0.060             |
| <b>Extinction</b>        | <b>RI-Test (red)</b> | <b>-0.296</b>   | <b>0.117</b> | <b>-2.530</b> | <b>-0.528</b> | <b>0.029</b>      |
| <b>RI-Test (control)</b> | <b>RI-Test (red)</b> | <b>-0.162</b>   | <b>0.069</b> | <b>-2.348</b> | <b>-0.489</b> | <b>0.029</b>      |

Note. P-value adjusted for comparing a family of 3

Note. Results are averaged over the levels of: CS-type

Note. For all tests, the alternative hypothesis specifies that Measure 1 is less than Measure 2.

## Exclusion of outliers (median $\pm 3\sigma$ ) in observational reinstatement Experiment 2 SCR

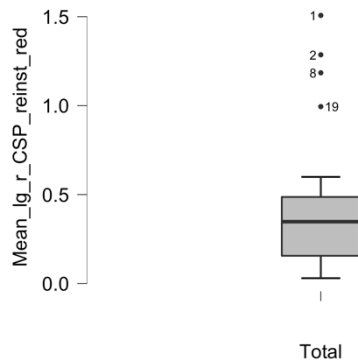

Figure S5: Boxplot labeling outlier participants by CS+ responses in the reinstatement-test in context B (red reinstatement context)

In order to test if responses within the reinstatement-test were driven by outliers, we excluded outliers, defined as mean CS+ responses in reinstatement-test within context B (red reinstatement context) that were above or below median  $\pm 3\sigma$ , respectively (N=4, see figure S2). The results resembled the findings reported within the whole sample (see table S7), albeit missing the alpha level of  $p=0.05$ .

**Table S 17: One-sample paired Samples T-Test comparing responses in the reinstatement and control context with extinction learning when excluding outliers (CS+ responses in the red reinstatement context).**

|                                                          | t             | df        | $p_{\text{uncorr}}$ | Mean Difference | SE Difference | Cohen's d     |
|----------------------------------------------------------|---------------|-----------|---------------------|-----------------|---------------|---------------|
| Ext vs control context (mean across CS)                  | -0.461        | 16        | 0.326               | -0.030          | 0.066         | -0.112        |
| <b>Ext vs red reinstatement context (mean across CS)</b> | <b>-1.566</b> | <b>16</b> | <b>0.068</b>        | <b>-0.083</b>   | <b>0.053</b>  | <b>-0.380</b> |
| CSP_ext_block2 vs. CSP_reinst_contr                      | -0.174        | 16        | 0.432               | -0.016          | 0.094         | -0.042        |
| <b>CSP_ext_block2 vs. CSP_reinst_red</b>                 | <b>-0.871</b> | <b>16</b> | <b>0.198</b>        | <b>-0.048</b>   | <b>0.055</b>  | <b>-0.211</b> |
| CSM_ext_block vs. CSM_reinst_contr                       | -0.760        | 16        | 0.229               | -0.045          | 0.059         | -0.184        |
| <b>CSM_ext_block2 vs. CSM_reinst_red</b>                 | <b>-1.706</b> | <b>16</b> | <b>0.054</b>        | <b>-0.117</b>   | <b>0.069</b>  | <b>-0.414</b> |

Note. For all tests, the alternative hypothesis specifies that Measure 1 is less than Measure 2.

## Alternative range correction of SCRs to the maximum during acquisition

In order to test if observational reinstatement effects in Experiment 2 were contingent on the range-correction of SCRs, we included additional analyses of range-corrected SCRs to the maximum during acquisition (see table S18, S19 and figure S4).

**Table S 18:** Experiment 2 Range correction to maximal responses during acquisition.

### Simple comparisons Context (one-sided t-test)

|                          |                      | Mean Difference | SE           | t             | Cohen's d     | $p_{\text{holm}}$ |
|--------------------------|----------------------|-----------------|--------------|---------------|---------------|-------------------|
| Extinction               | RI-Test (control)    | -0.138          | 0.085        | -1.625        | -0.355        | 0.060             |
| <b>Extinction</b>        | <b>RI-Test (red)</b> | <b>-0.331</b>   | <b>0.126</b> | <b>-2.632</b> | <b>-0.574</b> | <b>0.024</b>      |
| <b>RI-Test (control)</b> | <b>RI-Test (red)</b> | <b>-0.193</b>   | <b>0.075</b> | <b>-2.583</b> | <b>-0.564</b> | <b>0.024</b>      |

Note. P-value adjusted for comparing a family of 3

Note. Results are averaged over the levels of: CS-type

Note. For all tests, the alternative hypothesis specifies that Measure 1 is less than Measure 2.

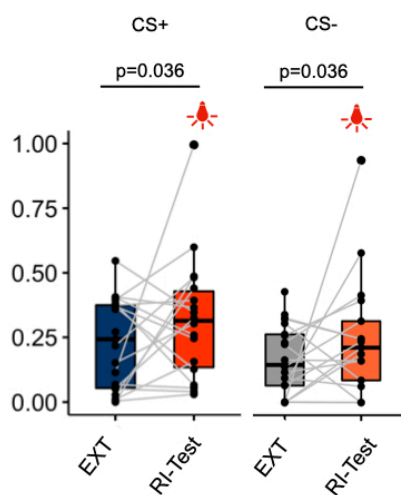

Figure S6: Boxplots of individual SCRs to both CSs during late extinction (2<sup>nd</sup> block) and reinstatement-test (1<sup>st</sup> block) in the reinstatement context.

## Table S20 EXTINCTION Test Experiment 3 rm ANOVA Freezing

Both, observers and demonstrators show reduced freezing to the extinguished CS1 in comparison to the non-extinguished CS2. No support for a difference between observer and demonstrator (to-be) animals.

### Within Subjects Effects

| Cases                      | Sphericity Correction | Sum of Squares | df   | Mean Square | F       | p         | $\eta^2_p$ |
|----------------------------|-----------------------|----------------|------|-------------|---------|-----------|------------|
| CS-type                    | None                  | 1608.348       | 1,21 | 1608.348    | 112.196 | 7.008e-10 | 0.842      |
| CS-type * type of learning | None                  | 8.864          | 1,21 | 8.864       | 0.618   | 0.440     | 0.029      |

Note. Sphericity corrections not available for factors with 2 levels.

Note. Type II Sum of Squares

### Between Subjects Effects

| Cases            | Sum of Squares | df   | Mean Square | F     | p     | $\eta^2_p$ |
|------------------|----------------|------|-------------|-------|-------|------------|
| type of learning | 13.660         | 1,21 | 13.660      | 0.930 | 0.346 | 0.042      |

Note. Type II Sum of Squares

### Simple Comparisons – CS type

|                                     | Mean Difference | SE    | t       | Cohen's d | p <sub>holm</sub> |
|-------------------------------------|-----------------|-------|---------|-----------|-------------------|
| CSP extinguished vs. CSP non-extin. | -11.788         | 1.118 | -10.548 | -2.199    | 7.550e-10         |

Note. Cohen's d does not correct for multiple comparisons.

Note. Results are averaged over the levels of: type of learning

### Descriptives

| CS_type          | type of learning | Mean   | SD    | N  |
|------------------|------------------|--------|-------|----|
| CSP extinguished | DEMONSTRATOR     | 3.167  | 3.346 | 12 |
|                  | OBSERVER         | 2.955  | 2.274 | 11 |
| CSP non-extin    | DEMONSTRATOR     | 15.833 | 3.620 | 12 |
|                  | OBSERVER         | 13.864 | 5.390 | 11 |

**Table S21 REINSTATEMENT-Test Experiment3 rm ANOVA Freezing**

**Within Subjects Effects**

| Cases                                      | Sphericity Correction | Sum of Squares | df   | Mean Square | F      | p               | $\eta^2_p$ |
|--------------------------------------------|-----------------------|----------------|------|-------------|--------|-----------------|------------|
| CS-type                                    | None                  | 1071.696       | 1,21 | 1071.696    | 78.821 | 1.491e-8        | 0.790      |
| CS-type * type of learning                 | None                  | 1.402          | 1,21 | 1.402       | 0.103  | 0.751           | 0.005      |
| Reinstatement                              | None                  | 47.348         | 1,21 | 47.348      | 4.802  | <b>0.040</b>    | 0.186      |
| Reinstatement * type of learning           | None                  | 21.209         | 1,21 | 21.209      | 2.151  | 0.157           | 0.093      |
| CS-type * Reinstatement                    | None                  | 575.000        | 1,21 | 575.000     | 38.186 | <b>3.944e-6</b> | 0.645      |
| CS_type * Reinstatement * type of learning | None                  | 9.159          | 1,21 | 9.159       | 0.608  | 0.444           | 0.028      |

Note. Sphericity corrections not available for factors with 2 levels.

Note. Type II Sum of Squares

**Between Subjects Effects**

| Cases            | Sum of Squares | df   | Mean Square | F     | p     | $\eta^2_p$ |
|------------------|----------------|------|-------------|-------|-------|------------|
| type of learning | 96.671         | 1,21 | 96.671      | 6.774 | 0.017 | 0.244      |

Note. Type II Sum of Squares

**Simple comparisons – CS-type**

|                                    | Mean Difference | SE    | t      | Cohen's d | p holm   |
|------------------------------------|-----------------|-------|--------|-----------|----------|
| CSP extinguished vs. CSP non-extin | -6.815          | 0.770 | -8.856 | -1.847    | 1.555e-8 |

Note. Cohen's d does not correct for multiple comparisons.

Note. Results are averaged over the levels of: type of learning, Reinstatement

**Simple Comparisons – CS-type \* Reinstatement**

Increase in freezing from Ext to RI to CS1, decrease in freezing for CS2. No difference between CS1 and CS2 after Reinstatement.

|                                   |                                 | Mean Difference | SE    | t       | p holm   |
|-----------------------------------|---------------------------------|-----------------|-------|---------|----------|
| CSP extinguished, Extinction Test | CSP non-extin., Extinction Test | -11.788         | 1.117 | -10.551 | 1.36e-12 |
|                                   | CSP extinguished, RI-Test       | -6.366          | 1.042 | -6.110  | 1.294e-6 |
|                                   | CSP non-extin, RI-Test          | -8.208          | 1.011 | -8.120  | 2.283e-9 |
| CSP non-extin, Extinction Test    | CSP extinguished, RI-Test       | 5.422           | 1.011 | 5.364   | 1.038e-5 |
|                                   | CSP non-extin, RI-Test          | 3.580           | 1.042 | 3.436   | 0.003    |
| CSP extinguished, RI-Test         | CSP non-extin, RI-Test          | -1.843          | 1.117 | -1.649  | 0.107    |

Note. P-value adjusted for comparing a family of 6

Note. Results are averaged over the levels of: type of learning

### Simple Comparisons - type of learning

|                       | Mean Difference | SE    | t     | Cohen's d | p <sub>holm</sub> |
|-----------------------|-----------------|-------|-------|-----------|-------------------|
| DEMONSTRATOR OBSERVER | 2.052           | 0.788 | 2.603 | 0.543     | 0.017             |

Note. Cohen's d does not correct for multiple comparisons.

Note. Results are averaged over the levels of: CS\_type, Reinstatement

### Table S22 Comparisons between demonstrators and observers Two-sided Independent Samples T-Test Freezing

Besides a main effect for "type of learning" in the ANOVA, there is no support for a difference in freezing behaviour during extinction test or reinstatement test between demonstrators and observers.

|                                   | t     | df | p <sub>uncorr</sub> | p <sub>holm</sub> | Mean Difference | SE Difference | Cohen's d |
|-----------------------------------|-------|----|---------------------|-------------------|-----------------|---------------|-----------|
| CSP extinguished, Extinction Test | 0.176 | 21 | 0.862               | 0.862             | 0.212           | 1.205         | 0.074     |
| CSP extinguished, RI-Test         | 2.212 | 21 | 0.038               | 0.152             | 3.398           | 1.536         | 0.924     |
| CSP non-extin., Extinction Test   | 1.037 | 21 | 0.311               | 0.622             | 1.970           | 1.899         | 0.433     |
| CSP non-extin., RI-Test           | 1.970 | 21 | 0.062               | 0.186             | 2.629           | 1.335         | 0.822     |

Note. Student's t-test.

### Descriptives

| CS_type          | Reinstatement   | type of learning | Mean   | SD    | N  |
|------------------|-----------------|------------------|--------|-------|----|
| CSP extinguished | Extinction Test | DEMONSTRATOR     | 3.167  | 3.346 | 12 |
|                  |                 | OBSERVER         | 2.955  | 2.274 | 11 |
|                  | RI-Test         | DEMONSTRATOR     | 11.125 | 3.562 | 12 |
|                  |                 | OBSERVER         | 7.727  | 3.804 | 11 |
| CSP non-extin.   | Extinction Test | DEMONSTRATOR     | 15.833 | 3.620 | 12 |
|                  |                 | OBSERVER         | 13.864 | 5.390 | 11 |
|                  | RI-Test         | DEMONSTRATOR     | 12.583 | 2.193 | 12 |
|                  |                 | OBSERVER         | 9.955  | 4.022 | 11 |



**Table S23 One-sided paired samples t-Test Observers only  
Experiment 3 Freezing**

**Paired Samples T-Test increase from Extinction Test to Reinstatement Test to CS 1 and CS2**

| Measure 1                        | Measure 2                   | t     | df | p          | Mean Difference | SE Difference | Cohen's d |
|----------------------------------|-----------------------------|-------|----|------------|-----------------|---------------|-----------|
| CSPextinguished, Extinction Test | - CSPextinguished, RI- Test | -5.05 | 10 | 2.490e - 4 | -4.773          | 0.945         | -1.523    |
| CSPnon-extin., Extinction Test   | - CSP non-extin., RI- Test  | 2.120 | 10 | 0.970      | 3.909           | 1.844         | 0.639     |

*Note.* For all tests, the alternative hypothesis specifies that Measure 1 is less than Measure 2.

*Note.* Student's t-test.

**Descriptives**

|                                   | N  | Mean   | SD    | SE    |
|-----------------------------------|----|--------|-------|-------|
| CSP extinguished, Extinction Test | 11 | 2.955  | 2.274 | 0.686 |
| CSP extinguished, RI- Test        | 11 | 7.727  | 3.804 | 1.147 |
| CSP non-extin., Extinction Test   | 11 | 13.864 | 5.390 | 1.625 |
| CSP non-extin., RI- Test          | 11 | 9.955  | 4.022 | 1.213 |

**Table S24 One-sided paired samples t-Test \_ Experiment 3 Freezing**

**Paired Samples T-Test increase from Extinction Test to Reinstatement Test to CS 1 and CS2**

| Measure 1                        | Measure 2                   | t     | df | p          | Mean Difference | SE Difference | Cohen's d |
|----------------------------------|-----------------------------|-------|----|------------|-----------------|---------------|-----------|
| CSPextinguished, Extinction Test | - CSPextinguished, RI- Test | -4.97 | 11 | 2.154e - 4 | -7.958          | 1.605         | -1.431    |
| CSPnon-extin., Extinction Test   | - CSP non-extin., RI- Test  | 2.440 | 11 | 0.984      | 3.250           | 1.332         | 0.704     |

*Note.* For all tests, the alternative hypothesis specifies that Measure 1 is less than Measure 2.

*Note.* Student's t-test.

**Descriptives**

|                                   | N  | Mean   | SD    | SE    |
|-----------------------------------|----|--------|-------|-------|
| CSP extinguished, Extinction Test | 12 | 3.167  | 3.346 | 0.966 |
| CSP extinguished, RI- Test        | 12 | 11.125 | 3.562 | 1.028 |
| CSP non-extin., Extinction Test   | 12 | 15.833 | 3.620 | 1.045 |
| CSP non-extin., RI- Test          | 12 | 12.583 | 2.193 | 0.633 |

## Exclusion of outliers (median $\pm 3\sigma$ ) in observational reinstatement Experiment 3 Freezing behaviour

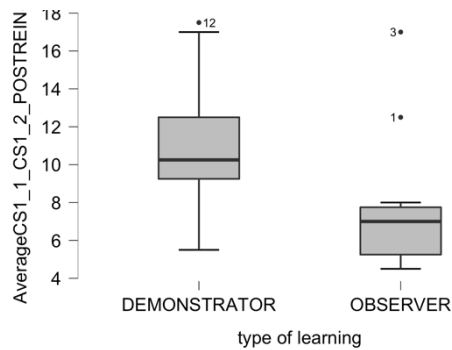

Figure S7: Boxplots labeling outlier rats by responses to the extinguished CS+ in the reinstatement-test in the demonstrator group and the observer group.

In order to test if responses within the reinstatement-test were driven by outliers, we excluded outliers, defined as mean responses to the extinguished CS+ in the reinstatement-test that were above or below median  $\pm 3\sigma$ , respectively (N=3, see figure S3).

Table S25

### Paired Samples T-Test increase from Extinction Test to Reinstatement Test to CS+extinguished and CS+unextinguished

| Measure 1                                 | Measure 2                         | t     | df | p        | Mean Difference | SE Difference | Cohen's d |
|-------------------------------------------|-----------------------------------|-------|----|----------|-----------------|---------------|-----------|
| <b>Whole sample</b> (outlier excluded)    |                                   |       |    |          |                 |               |           |
| <b>CSP extinguished</b> – Extinction Test | <b>CSP extinguished</b> – RI-Test | 5.457 | 18 | 1.747e-5 | -5.842          | 1.071         | -1.252    |
| <b>CSP non-extin</b> Extinction Test      | <b>CSP non-extin</b> – RI-Test    | 2.40  | 18 | 0.986    | 3.000           | 1.249         | 0.551     |
| <b>Observers only</b> (outlier excluded)  |                                   |       |    |          |                 |               |           |
| <b>CSP extinguished</b> – Extinction Test | <b>CSP extinguished</b> – RI-Test | 5.265 | 7  | 5.834e-4 | -3.688          | 0.700         | -1.861    |
| <b>CSP non-extin</b> Extinction Test      | <b>CSP non-extin</b> – RI-Test    | 1.165 | 7  | 0.859    | 2.688           | 2.307         | 0.412     |

Note. For all tests, the alternative hypothesis specifies that Measure 1 is less than Measure 2.

Note. Student's t-test.

## ***No evidence for a difference in neural activation between demonstrators and observers of reinstatement***

### **FOS immunolabeling method and analysis**

We examined 18 male Sprague-Dawley rats that were housed similar to the rats in experiment 3. Rats underwent the protocol that is described for experiment 3, but no reinstatement-test was performed.

90 minutes following the last behavioral test, animals were deeply anesthetized with ketamine (100mg/kg) and xylazine (10mg/kg), exsanguinated with approximately 100 ml PBS and perfused with 500 ml of freshly made 4% paraformaldehyde (PFA). The brain was removed from the skull, blocked into 4 mm slabs and post-fixed overnight in 4% PFA. The following day, the brains were cut on a Leica V1000S Vibratome into 50  $\mu$ m sections, and collected in PBS/0.05% sodium azide. Tissue sections from similar AP levels were selected from each condition incubated for 30 min in 1% bovine serum albumin (BSA; Sigma) to block nonspecific binding and then incubated overnight (18 h) in polyclonal rabbit anti-c-Fos antiserum (1:20,000; PC38, Calbiochem, La Jolla, CA). Free-floating sections were then rinsed with PBS (0.01 M, pH 7.4, at room temperature), incubated for 30 min in biotinylated goat anti-rabbit IgG (Vector Laboratories, Burlingame, CA), rinsed and incubated for 30 min in the avidin–biotin–horseradish peroxidase complex (VECTASTAIN Elite Kit, Vector). Staining was visualized using the chromogen Very Intense Purple (VIP:Vector Laboratories). Sections were then mounted on gelatinized slides, dehydrated and coverslipped. Primary and secondary antibody incubations were made in 1% BSA/PBS; the primary incubation also contained 0.2% Triton-X. Alternate sections were Nissl-stained to help delineate the borders between the amygdala nuclei.

High-resolution low and higher (2 and 10X) magnification digital images were acquired using an Olympus VS-120 microscope (Tokyo, Japan) and the brain region of interest delineated using alternate Nissl-stained sections and criteria from the Paxinos and Watson stereotaxic atlas. The color images were converted to black and white and a trained rater blinded to experimental conditions quantified labeled cells using NIH's ImageJ automated cell counter pluggin. Cell counts were expressed as the density of labelled cells per mm<sup>2</sup> of tissue and cell counts were made according to hemisphere. Within each animal, multiple tissue sections were pooled to produce a mean value for each group of rats.

### **Results**

We expected that the expression of immediate early genes (c-fos) would diverge in demonstrator and observer rats within the thalamic parafascicular nucleus and the anterior cingulate cortex (CG1), since both regions have been found to play a role in animals that observe aversive experiences (1–4). Additionally, we examined c-fos expression within regions that are known to be involved in acquisition and reinstatement of CS-US memory (i.e., centromedial amygdala, basolateral amygdala, the infralimbic and pre-limbic cortex (5–7)). In line with previous reports of neural activation after reinstatement, we found enhanced expression of c-fos within these ROIs [main effect of ROI:  $F(5,10)=8.71$ ;  $p=0.002$ ].

Against our hypothesis, we found no univariate differences between demonstrators and observers within any of our ROIs [main effect of demonstrator / observer:  $F<1$ ;  $p>0.9$ ; interaction between ROIs and demonstrator/ observer  $F<1$ ;  $p>0.6$ ]. Bayesian statistics further supported these results, by providing moderate evidence for ROI specific c-fos expression in the data ( $BF_{10}$  for inclusion to a model =2.7), but there was no support for an influence of demonstrator or observer status in the c-fos data ( $BF_{10}$  for inclusion to a model = 0.3). We point out that the rather unspecific method of c-fos staining does not unambiguously provide evidence for an absence of differences between observers and demonstrators in neural activation. In fact, studies in rodents and humans have shown that general responses in brain regions overlap between observational and first-hand aversive

events, yet the underlying processes within these brain regions (e.g, connectivity or projection neurons) diverge. Hence, our data can merely suggest that stark contrasts in neural activation that would be visible in c-fos expression between observers and demonstrators is not supported by our data.

While our finding supports no difference in c-fos activity between observed and direct reinstatement provides, we investigated only a subset of regions that we defined *a priori* and a technique that does not allow to examine finer-grained neural processes.

### SI References:

1. S. A. Allsop, *et al.*, Corticoamygdala Transfer of Socially Derived Information Gates Observational Learning. *Cell* **173**, 1329-1342.e18 (2018).
2. M. Carrillo, *et al.*, Emotional Mirror Neurons in the Rat's Anterior Cingulate Cortex. *Current Biology* **29**, 1301-1312.e6 (2019).
3. J. Debiec, A. Olsson, Social Fear Learning: from Animal Models to Human Function. *Trends Cogn. Sci. (Regul. Ed.)* **21**, 546–555 (2017).
4. D. Jeon, *et al.*, Observational fear learning involves affective pain system and Cav1.2 Ca<sup>2+</sup> channels in ACC. *Nat Neurosci* **13**, 482–488 (2010).
5. E. Knapska, *et al.*, Functional anatomy of neural circuits regulating fear and extinction. *PNAS* **109**, 17093–17098 (2012).
6. R. C. R. Martinez, *et al.*, Active vs. reactive threat responding is associated with differential c-Fos expression in specific regions of amygdala and prefrontal cortex. *Learning & Memory* **20**, 446–452 (2013).
7. A. K. Rajbhandari, R. Zhu, C. Adling, M. S. Fanselow, J. A. Waschek, Graded fear generalization enhances the level of c-fos-positive neurons specifically in the basolateral amygdala: Fear Generalization and c-fos-Positive Neurons in the BLA. *Journal of Neuroscience Research* **94**, 1393–1399 (2016).
